# Supplementary material for: A variant-centric perspective on geographic patterns of human allele frequency variation
Source: eLife. 2020 Dec 22;9:e60107. doi: 10.7554/eLife.60107 (PMC7755386; doi:10.7554/eLife.60107)
Supplement: Supplementary file 1. — Population abbreviations and groupings used in the study. [file elife-60107-supp1.xlsx]

## Sheet: Sheet1
Population description	Population code (1KGP)	Superpopulation code (1KGP)	Regional grouping (This study)
African Ancestry in Southwest US	ASW	AFR	AMR
Yoruba in Ibadan, Nigeria	YRI	AFR	AFR
Luhya in Webuye, Kenya	LWK	AFR	AFR
Japanese in Tokyo, Japan	JPT	EAS	EAS
Chinese Dai in Xishuangbanna, China	CDX	EAS	EAS
Utah residents (CEPH) with Northern and Western European ancestry	CEU	EUR	AMR
Han Chinese in Beijing, China	CHB	EAS	EAS
Gujarati Indians in Houston, TX	GIH	SAS	SAS
Gambian in Western Division, The Gambia - Mandinka	GWD	AFR	AFR
Mende in Sierra Leone	MSL	AFR	AFR
Iberian populations in Spain	IBS	EUR	EUR
Toscani in Italy	TSI	EUR	EUR
Punjabi in Lahore, Pakistan	PJL	SAS	SAS
Esan in Nigeria	ESN	AFR	AFR
Mexican Ancestry in Los Angeles, California	MXL	AMR	AMR
Colombian in Medellin, Colombia	CLM	AMR	AMR
Peruvian in Lima, Peru	PEL	AMR	AMR
Han Chinese South	CHS	EAS	CHB
Puerto Rican in Puerto Rico	PUR	AMR	AMR
Finnish in Finland	FIN	EUR	EUR
Kinh in Ho Chi Minh City, Vietnam	KHV	EAS	EAS
Bengali in Bangladesh	BEB	SAS	SAS
African Caribbean in Barbados	ACB	AFR	AMR
Indian Telugu in the UK	ITU	SAS	SAS
British in England and Scotland	GBR	EUR	EUR
Sri Lankan Tamil in the UK	STU	SAS	SAS
